# Supplementary material for: Carbon Amendments Influence Composition and Functional Capacities of Indigenous Soil Microbiomes
Source: Front Mol Biosci. 2020 Jan 9;6:151. doi: 10.3389/fmolb.2019.00151 (PMC6964746; doi:10.3389/fmolb.2019.00151)
Supplement: Table S1 — Analysis of variance assessing the differences in soil chemical and Streptomyces community characteristics, bacterial community alpha diversity and richness, and relative abundance of the three most abundant bacterial phyla in low- and high-nutrient soil in response to carbon amendments (NSp > 0.05; **p < 0.05). [file Table_1.XLSX]

## Sheet: Supp.Table1
Table S1. Analysis of variance assessing the differences in soil chemical and Streptomyces community characteristics, bacterial community alpha diversity and richness, and relative abundance of the three most abundant bacterial phyla in low- and high-nutrient soil in response to carbon amendments (NS = p > 0.05; ** = p < 0.05).
		Carbon amendment type		Carbon amendment dose		Carbon amendment type*dose interaction
	Soil	F-value	p-value	F-value	p-value	F-value	p-value
Soil pH	Low-organic matter	53.29	**	26.02	**	4.1	**
	High-organic matter	52.77	**	24.36	**	2.37	NS
Soil total carbon (TC)	Low-organic matter	6.3	**	94.87	**	2.3	NS
	High-organic matter	3.12	**	23.49	**	1.25	NS
Soil total nitrogen (TN)	Low-organic matter	1.58	NS	17.5	**	1.57	NS
	High-organic matter	1.39	NS	0.34	NS	0.93	NS
Density of Streptomyces (total)	Low-organic matter	40.77	**	53.13	**	10.08	**
	High-organic matter	1.63	NS	0.18	NS	0.85	NS
Density of pathogen-inhibitory Streptomyces	Low-organic matter	10.74	**	8.19	**	3.28	**
	High-organic matter	0.26	NS	0.13	NS	1.8	NS
Proportion of Streptomyces inhibitory of S. scabies	Low-organic matter	2.03	NS	5.87	**	0.004	NS
	High-organic matter	1.97	NS	0.04	NS	0.29	NS
Proportion of Streptomyces inhibitory of F. oxysporum	Low-organic matter	2.045	NS	4.36	**	0.675	NS
	High-organic matter	2.01	NS	0.09	NS	0.87	NS
Streptomyces mean inhibitory zone size against inhibitory of S. scabies (mm)	Low-organic matter	1.096	NS	4.97	**	2.2	NS
	High-organic matter	0.2	NS	1.17	NS	0.37	NS
Streptomyces mean inhibitory zone size against inhibitory of F. oxysporum (mm)	Low-organic matter	0.28	NS	0.48	NS	0.44	NS
	High-organic matter	0.34	NS	1.43	NS	2.31	NS
Bacterial shannon diversity index	Low-organic matter	92.43	**	4.12	NS	22.37	**
	High-organic matter	2.7	NS	3.98	NS	2.5	NS
Bacterial richness	Low-organic matter	8.76	**	0.28	NS	1.82	NS
	High-organic matter	1.61	NS	5.02	**	1.18	NS
Actinobacteria relative abundance	Low-organic matter	12.79	**	1.26	NS	3.97	**
	High-organic matter	2.21	NS	0.37	NS	6.63	**
Firmicutes relative abundance	Low-organic matter	2.37	NS	3.21	NS	10.32	**
	High-organic matter	1.03	NS	2.15	NS	0.45	NS
Proteobacteria relative abundance	Low-organic matter	2.34	NS	10.48	**	9.89	**
	High-organic matter	0.844	NS	0.02	NS	3.39	**
