# Supplementary material for: Carbon Amendments Influence Composition and Functional Capacities of Indigenous Soil Microbiomes
Source: Front Mol Biosci. 2020 Jan 9;6:151. doi: 10.3389/fmolb.2019.00151 (PMC6964746; doi:10.3389/fmolb.2019.00151)
Supplement: Table S2 — Soil chemical and Streptomyces community characteristics, and bacterial community alpha diversity and OTU richness, and relative abundance of the three most abundant bacterial phyla in carbon-amended and non-amended low- and high-organic matter soils. For each treatment, the mean value and standard error of the mean are reported. F-statistic and p-values correspond to the comparison between low and high doses the same carbon substrate (NSp > 0.05; *p < 0.1; **p < 0.05). [file Table_2.XLSX]

## Sheet: Supp.Table2
Table S2. Soil chemical and Streptomyces community characteristics, and bacterial community alpha diversity and OTU richness, and relative abundance of the three most abundant bacterial phyla in carbon-amended and non-amended low- and high-organic matter soils. For each treatment, the mean value and standard error of the mean are reported. F-statistic and p values correspond to the comparison bet…
		Treatment
	Soil	Carbon substrate	Dose	Mean	S.E.	F-value	p-value
Soil pH	Low-organic matter	Control Pre	None	5.4	0.04
		Control Post	None	4.99	0.04
		Fructose	Low	4.47	0.18	34.427	**
			High	3.57	0.11
		Glucose	Low	4.12	0.22	7.2736	**
			High	3.5	0.05
		Malic acid	Low	2.83	0.03	1.444	NS
			High	2.71	0.09
		Mixture	Low	3.08	0.02	6.6046	**
			High	2.87	0.07
	High-organic matter	Control Pre	None	6.3	0.08
		Control Post	None	5.07	0.08
		Fructose	Low	5.01	0.05	0.0001	NS
			High	4.8	0.1
		Glucose	Low	4.93	0.1	21.193	**
			High	4.53	0.06
		Malic acid	Low	3.39	0.14	11.108	**
			High	2.91	0.04
		Mixture	Low	4.33	0.18	9.7212	**
			High	3.36	0.25
Soil total carbon (TC)	Low-organic matter	Control	None	1.27	0.06
		Fructose	Low	1.9	0.08	95.052	**
			High	3.29	0.11
		Glucose	Low	1.7	0.16	7.2792	**
			High	2.64	0.28
		Malic acid	Low	2.24	0.15	44.423	**
			High	3.89	0.19
		Mixture	Low	1.92	0.09	25.711	**
			High	3.96	0.39
	High-organic matter	Control	None	2.39	0.03
		Fructose	Low	2.83	0.15	17.707	**
			High	3.53	0.34
		Glucose	Low	2.58	0.02	3.8458	**
			High	3.14	0.28
		Malic acid	Low	2.82	0.29	17.511	**
			High	4.4	0.18
		Mixture	Low	3.09	0.2	4.6502	*
			High	4.18	0.46
Soil total nitrogen (TN)	Low-organic matter	Control	None	0.09	0.004
		Fructose	Low	0.09	0.006	6.6829	**
			High	0.12	0.008
		Glucose	Low	0.09	0.01	0.1217	NS
			High	0.09	0.013
		Malic acid	Low	0.08	0.004	8.6968	**
			High	0.12	0.01
		Mixture	Low	0.07	0.003	22.221	**
			High	0.12	0.009
	High-organic matter	Control	None	0.21	0.003
		Fructose	Low	0.21	0.006	0.6682	NS
			High	0.23	0.02
		Glucose	Low	0.21	0.006	1.2846	NS
			High	0.2	0.008
		Malic acid	Low	0.2	0.01	0.5197	NS
			High	0.19	0.007
		Mixture	Low	0.2	0.004	1.9676	NS
			High	0.2	0.01
Density of Streptomyces (total)	Low-organic matter	Control	None	5.77	0.04
		Fructose	Low	5.52	0.07	168.14	**
			High	4.3	0.05
		Glucose	Low	6.03	0.04	78.539	**
			High	4.99	0.07
		Malic acid	Low	4.19	0.1	2.0724	NS
			High	4.01	0.06
		Mixture	Low	4.75	0.012	0.1581	NS
			High	4.63	0.27
	High-organic matter	Control	None	6.37	0.17
		Fructose	Low	6.4	0.11	0.1212	NS
			High	6.4	0.2
		Glucose	Low	6.55	0.11	3.5357	*
			High	6.84	0.09
		Malic acid	Low	6.64	0.11	1.6536	NS
			High	6.41	0.13
		Mixture	Low	6.29	0.13	0.1305	NS
			High	6.41	0.3
Density of pathogen-inhibitory Streptomyces	Low-organic matter	Control	None	4.38	0.16
		Fructose	Low	4.19	0.07	17.482	**
			High	3.45	0.16
		Glucose	Low	4.34	0.07	10.205	**
			High	3.94	0.09
		Malic acid	Low	3.33	0.21	0.0028	NS
			High	3.35	0.18
		Mixture	Low	3.85	1.12	0.0005	NS
			High	3.85	0.15
	High-organic matter	Control	None	5.23	0.06
		Fructose	Low	4.98	0.03	0.1969	NS
			High	5.12	0.14
		Glucose	Low	5.09	0.07	1.977	NS
			High	5.23	0.06
		Malic acid	Low	5.23	0.14	2.2533	NS
			High	4.94	0.14
		Mixture	Low	5.02	0.09	0.6311	NS
			High	5.19	0.18
Proportion of Streptomyces inhibitory of S. scabies	Low-organic matter	Control	None	0.34	0.03
		Fructose	Low	0.33	0.05	1.9063	NS
			High	0.52	0.12
		Glucose	Low	0.3	0.12	2.5239	NS
			High	0.5	0.06
		Malic acid	Low	0.56	0.13	1.1296	NS
			High	0.77	0.13
		Mixture	Low	0.47	0.12	1.5066	NS
			High	0.66	0.11
	High-organic matter	Control	None	0.48	0.17
		Fructose	Low	0.29	0.04	0.0047	NS
			High	0.27	0.03
		Glucose	Low	0.23	0.03	1.2598	NS
			High	0.19	0.02
		Malic acid	Low	0.3	0.04	0.0001	NS
			High	0.3	0.07
		Mixture	Low	0.3	0.03	0.269	NS
			High	0.34	0.06
Proportion of Streptomyces inhibitory of F. oxysporum	Low-organic matter	Control	None	0.15	0.02
		Fructose	Low	0.21	0.04	3.4822	*
			High	0.5	0.15
		Glucose	Low	0.14	0.013	4.6003	**
			High	0.42	0.11
		Malic acid	Low	0.48	0.17	0.3606	NS
			High	0.62	0.14
		Mixture	Low	0.51	0.1	0.0011	NS
			High	0.51	0.13
	High-organic matter	Control	None	0.27	0.07
		Fructose	Low	0.21	0.07	3.1558	NS
			High	0.27	0.03
		Glucose	Low	0.2	0.03	1.9826	NS
			High	0.15	0.02
		Malic acid	Low	0.17	0.02	0.0278	NS
			High	0.18	0.05
		Mixture	Low	0.22	0.02	0.0549	NS
			High	0.24	0.04
Streptomyces mean inhibitory zone size against inhibitory of S. scabies (mm)	Low-organic matter	Control	None	2.21	0.16
		Fructose	Low	1.87	0.62	4.4	*
			High	3.33	0.3
		Glucose	Low	2.29	0.75	10.009	**
			High	4.46	0.22
		Malic acid	Low	3.27	0.6	0.0315	NS
			High	3.14	0.35
		Mixture	Low	3.26	0.76	0.0057	NS
			High	3.2	0.34
	High-organic matter	Control	None	2.61	0.38
		Fructose	Low	2.78	0.26	0.1196	NS
			High	2.48	0.58
		Glucose	Low	3.27	0.93	1.2211	NS
			High	2.23	0.1
		Malic acid	Low	2.37	0.1	0.0007	NS
			High	2.36	0.28
		Mixture	Low	2.77	0.65	0.0753	NS
			High	2.53	0.56
Streptomyces mean inhibitory zone size against inhibitory of F. oxysporum (mm)	Low-organic matter	Control	None	2.34	0.53
		Fructose	Low	3.33	1.38	0.2277	NS
			High	2.77	0.41
		Glucose	Low	2.91	1.05	0.8372	NS
			High	2.09	0.15
		Malic acid	Low	2.41	0.34	0.4164	NS
			High	2.88	0.63
		Mixture	Low	2.76	0.4	0.2389	NS
			High	2.49	0.25
	High-organic matter	Control	None	2.12	0.71
		Fructose	Low	3.49	1.9	0.716	NS
			High	1.23	0.53
		Glucose	Low	1.72	0.6	0.0001	NS
			High	1.71	0.9
		Malic acid	Low	1.68	0.35	3.8436	*
			High	2.44	0.21
		Mixture	Low	2.62	0.07	8.7219	**
			High	1.27	0.72
Bacterial Shannon diversity index	Low-organic matter	Control	None	9.35	0.006
		Fructose	Low	4.77	0.17	55.533	**
			High	2.87	0.18
		Glucose	Low	5.75	0.08	1.782	NS
			High	5.95	0.12
		Malic acid	Low	6.76	0.06	0.0061	NS
			High	6.75	0.17
		Mixture	Low	5.68	0.31	5.4817	NS
			High	6.65	0.07
	High-organic matter	Control	None	9.93	0.03
		Fructose	Low	7.98	0.64	0.0492	NS
			High	7.75	0.84
		Glucose	Low	8.55	0.31	18.671	* *
			High	5.96	0.5
		Malic acid	Low	7.93	0.83	0.0404	NS
			High	8.11	0.32
		Mixture	Low	9.05	0.15	1.4667	NS
			High	8.58	0.36
Bacterial richness	Low-organic matter	Control	None	1293	33.6
		Fructose	Low	244.33	40.33	1.6676	NS
			High	179.33	30.11
		Glucose	Low	337	15.01	1.5842	NS
			High	406.33	8.83
		Malic acid	Low	362	14	2.7453	NS
			High	298	36
		Mixture	Low	309.33	56.85	0.0124	NS
			High	301	19
	High-organic matter	Control	None	1711.66	32.44
		Fructose	Low	1102.33	193.14	0.1146	NS
			High	997.66	241.5
		Glucose	Low	1160.33	107.85	18.071	**
			High	547.66	95.59
		Malic acid	Low	1017	201.1	0.2296	NS
			High	893	162.85
		Mixture	Low	1265.3	72.45	1.591	NS
			High	1107	102.5
Actinobacteria	Low-organic matter	Control	None	0.24	0.003
		Fructose	Low	0.08	0.002	1433.2	**
			High	0.003	0.002
		Glucose	Low	0.27	0.02	3.26	NS
			High	0.13	0.07
		Malic acid	Low	0.01	0.002	1.7	NS
			High	0.01	0.01
		Mixture	Low	0.08	0.04	1.9	NS
			High	0.16	0.04
	High-organic matter	Control	None	0.29	0.02
		Fructose	Low	0.49	0.05	0.84	NS
			High	0.56	0.06
		Glucose	Low	0.5	0.04	29.3	**
			High	0.73	0.02
		Malic acid	Low	0.6	0.03	3.93	NS
			High	0.49	0.05
		Mixture	Low	0.56	0.02	2.36	NS
			High	0.44	0.07
Firmicutes	Low-organic matter	Control	None	0.07	0.01
		Fructose	Low	0.28	0.06	112.6	**
			High	0.96	0.01
		Glucose	Low	0.17	0.02	5.26	*
			High	0.6	0.19
		Malic acid	Low	0.98	0.003	11.06	**
			High	0.38	0.18
		Mixture	Low	0.6	0.2	0.24	NS
			High	0.7	0.06
	High-organic matter	Control	None	0.01	0.001
		Fructose	Low	0.02	0.05	2.33	NS
			High	0.06	0.02
		Glucose	Low	0.06	0.01	1.15	NS
			High	0.07	0.01
		Malic acid	Low	0.02	0.01	0.33	NS
			High	0.05	0.04
		Mixture	Low	0.04	0.01	0.01	NS
			High	0.04	0.01
Proteobacteria	Low-organic matter	Control	None	0.29	0.02
		Fructose	Low	0.52	0.04	117.2	**
			High	0.02	0.01
		Glucose	Low	0.39	0.02	3.13	NS
			High	0.21	0.1
		Malic acid	Low	0.01	0.001	58.4	**
			High	0.26	0.03
		Mixture	Low	0.3	0.15	1.66	NS
			High	0.1	0.03
	High-organic matter	Control	None	0.22	0.006
		Fructose	Low	0.25	0.04	1.55	NS
			High	0.19	0.03
		Glucose	Low	0.25	0.05	6.8	0.06
			High	0.12	0.09
		Malic acid	Low	0.22	0.1	0.47	NS
			High	0.28	0.03
		Mixture	Low	0.19	0.02	10.4	**
			High	0.3	0.03
