# Supplementary material for: Carbon Amendments Influence Composition and Functional Capacities of Indigenous Soil Microbiomes
Source: Front Mol Biosci. 2020 Jan 9;6:151. doi: 10.3389/fmolb.2019.00151 (PMC6964746; doi:10.3389/fmolb.2019.00151)
Supplement: Table S3 — Pearson's correlation matrix of soil chemical and Streptomyces community characteristics in low- and high-organic matter soils. Values indicate Pearson's correlation coefficient (r2, top) and p-value (bottom) for each comparison. [file Table_3.XLSX]

## Sheet: Supp.Table3
Table S3. Pearson’s correlation matrix of soil chemical and Streptomyces community characteristics in low- and high-organic matter soils. Values indicate Pearson’s correlation coefficient (r^2, top) and p value (bottom) for each comparison.
	Low-organic matter soils
	pH	TC	TN	Total. Streptomyces	Inhibitory. Streptomyces	Proportion. Inhibitory_Ss	Proportion. Inhibitory_Fo	MKZ_Ss	MKZ_Fo
pH	1	-0.49	-0.09	0.74	0.56	-0.49	-0.49	-0.32	0.26
	0	(p<0.05)	0.61	(p<0.05)	(p<0.05)	(p<0.05)	(p<0.05)	0.07	0.15
	TC	1	0.74	-0.56	-0.38	0.51	0.33	0.23	-0.14
		0	(p<0.05)	(p<0.05)	(p<0.05)	(p<0.05)	0.06	0.2	0.43
		TN	1	-0.24	-0.13	0.18	0.11	0.08	-0.05
			0	0.18	0.48	0.33	0.56	0.65	0.77
			Total. Streptomyces	1	0.79	-0.58	-0.61	-0.24	0.11
				0	(p<0.05)	(p<0.05)	(p<0.05)	0.18	0.53
				Inhibitory. Streptomyces	1	-0.12	-0.06	-0.34	0.2
					0	0.51	0.74	0.05	0.27
					Proportion. Inhibitory_Ss	1	0.78	0.01	0.16
						0	(p<0.05)	0.96	0.38
						Proportion. Inhibitory_Fo	1	0.01	0.05
							0	0.99	0.78
							MKZ_Ss	1	-0.13
								0	0.47
	High-organic matter soils
	pH	TC	TN	Total. Streptomyces	Inhibitory. Streptomyces	Proportion. Inhibitory_Ss	Proportion. Inhibitory_Fo	MKZ_Ss	MKZ_Fo
pH	1	-0.64	0.4	0.14	0.13	-0.27	0.09	0.16	0.12
	0	(p<0.05)	0.61	(p<0.05)	(p<0.05)	(p<0.05)	(p<0.05)	0.07	0.15
	TC	1	-0.14	0.4	-0.35	0.29	0.29	-0.1	-0.14
		0	(p<0.05)	(p<0.05)	(p<0.05)	(p<0.05)	0.06	0.2	0.43
		TN	1	0.2	0.2	-0.19	-0.01	0.03	-0.11
			0	0.18	0.48	0.33	0.56	0.65	0.77
			Total. Streptomyces	1	0.6	-0.77	-0.8	-0.15	-0.16
				0	(p<0.05)	(p<0.05)	(p<0.05)	0.18	0.53
				Inhibitory. Streptomyces	1	-0.07	-0.14	0.12	-0.35
					0	0.51	0.74	0.05	0.27
					Proportion. Inhibitory_Ss	1	0.78	0.13	0.06
						0	(p<0.05)	0.96	0.38
						Proportion. Inhibitory_Fo	1	0.24	-0.15
							0	0.99	0.78
							MKZ_Ss	1	-0.1
								0	0.47
