# Supplementary material for: Carbon Amendments Influence Composition and Functional Capacities of Indigenous Soil Microbiomes
Source: Front Mol Biosci. 2020 Jan 9;6:151. doi: 10.3389/fmolb.2019.00151 (PMC6964746; doi:10.3389/fmolb.2019.00151)
Supplement: Table S4 — Spearman's rank test of soil chemical, Streptomyces community metrics, and dominant bacterial phyla in low- and high-organic matter soils. Values indicate Spearman's Rho values (top) and p-values (bottom) corrected for multiple tests using a false discovery rate (FDR) method. [file Table_4.XLSX]

## Sheet: Supp.Table4
Table S4. Spearman’s rank test of soil chemical, Streptomyces community metrics, and dominant bacterial phyla in low- and high-organic matter soils. Values indicate Spearman’s Rho values (top) and p values (bottom) corrected for multiple tests using a false discovery rate (FDR) method.
	Low-organic matter soils
	pH	TC	TN	Total. Streptomyces	Inhibitory. Streptomyces	Proportion. Inhibitory_Ss	Proportion. Inhibitory_Fo	MKZ_Ss	MKZ_Fo
Diversity	-0.6	0.164912	-0.0290111	-0.112281	-0.110526	0.0171674	0.0245614	0.308824	-0.313618
	(p<0.05)	0.695963	0.959586	0.834652	0.834652	0.970911	0.964152	0.47615	0.528259
Richness	-0.160597	-0.1957	-0.275286	0.245722	0.0640632	-0.246626	-0.209741	0.328183	-0.404402
	0.707259	0.625764	0.481714	0.540999	0.892976	0.579705	0.610091	0.423997	0.358723
Actinobacteria	0.415652	-0.417391	-0.152808	0.641739	0.594783	-0.228766	-0.374864	0.061039	-0.141198
	0.138379	0.138274	0.670458	(p<0.05)	(p<0.05)	0.538505	0.178146	0.892976	0.810934
Firmicutes	-0.361739	0.384348	0.191119	-0.54087	-0.450435	0.279729	0.545336	0.206494	0.107239
	0.203931	0.168781	0.610091	(p<0.05)	0.111996	0.414752	(p<0.05)	0.610091	0.850678
Proteobacteria	0.470435	-0.52087	-0.210274	0.613913	0.490435	-0.446208	-0.602305	-0.2	-0.00536193
	0.0966178	0.0556558	0.558424	(p<0.05)	0.0763636	0.132709	(p<0.05)	0.610091	0.990986
Acidobacteria	0.595749	-0.63237	-0.185577	0.836014	0.762774	-0.439853	-0.550317	-0.255616	-0.0145609
	(p<0.05)	(p<0.05)	0.610091	(p<0.05)	(p<0.05)	0.133954	(p<0.05)	0.484922	0.970911
Bacteroidetes	-0.0469565	0.0869565	-0.0753157	0.0547826	0.0721739	0.0968294	-0.135682	-0.24026	-0.210903
	0.912166	0.847035	0.853984	0.892976	0.858973	0.83909	0.711839	0.526997	0.651679
Chloroflexi	0.54328	-0.375477	0.0802824	0.509544	0.357513	-0.455259	-0.277615	0.169469	-0.039462
	(p<0.05)	0.178146	0.85106	0.0592883	0.208701	0.128253	0.3883	0.657537	0.958693
Planctomycetes	0.447819	-0.597535	-0.277425	0.676822	0.641386	-0.391622	-0.412251	-0.0908234	-0.23265
	0.111996	(p<0.05)	0.3883	(p<0.05)	(p<0.05)	0.178146	0.138379	0.847035	0.617502
Verrucomicrobia	0.463884	-0.493877	-0.185696	0.64084	0.554861	-0.427985	-0.515983	-0.187215	-0.15315
	0.0981263	0.0717585	0.610091	(p<0.05)	(p<0.05)	0.138379	0.0556558	0.624658	0.777875
Gemmatimonadetes	0.165959	-0.24094	-0.0115122	0.460885	0.622844	-0.0995188	-0.060998	-0.084324	0.0378029
	0.639719	0.481715	0.970911	0.0998129	(p<0.05)	0.834652	0.89245	0.85324	0.958693
TM7	0.400459	-0.389062	-0.271039	0.630477	0.546551	-0.199121	-0.355983	-0.0520963	-0.401255
	0.146592	0.162636	0.405341	(p<0.05)	(p<0.05)	0.610091	0.209089	0.912166	0.297176
Armatimonadetes	0.432639	-0.0877379	-0.0348381	0.385744	0.488609	-0.350052	-0.0136175	-0.25807	-0.401807
	0.130823	0.847035	0.954064	0.166382	0.0756297	0.255159	0.970911	0.481714	0.297176
OD1	0.125576	-0.139649	-0.0850915	0.0595404	0.0216511	0.000771114	-0.227386	-0.14772	-0.238349
	0.7481	0.707259	0.847035	0.89245	0.964152	0.997283	0.519246	0.711735	0.610091
Cyanobacteria	0.423014	-0.527106	-0.244604	0.685238	0.541723	-0.445868	-0.409371	0.183894	-0.09829
	0.133119	(p<0.05)	0.480877	(p<0.05)	(p<0.05)	0.132709	0.138379	0.625764	0.853984
Nitrospirae	NA	NA	NA	NA	NA	NA	NA	NA	NA
	NA	NA	NA	NA	NA	NA	NA	NA	NA
WS3	NA	NA	NA	NA	NA	NA	NA	NA	NA
	NA	NA	NA	NA	NA	NA	NA	NA	NA
WPS.2	0.329997	-0.0253844	-0.0698982	0.312772	0.396177	-0.190638	0.0299238	-0.0203859	-0.401807
	0.263069	0.959586	0.862678	0.297176	0.151838	0.610091	0.958693	0.965882	0.297176
Chlamydiae	0.556317	-0.406801	-0.102319	0.579133	0.477676	-0.16685	-0.310751	0.202118	-0.230695
	(p<0.05)	0.140359	0.828618	(p<0.05)	0.0844369	0.656605	0.297176	0.610091	0.617898
AD3	0.415999	-0.402384	-0.0961834	0.552144	0.497686	-0.36766	-0.447863	-0.456134	-0.537757
	0.138274	0.14567	0.834652	(p<0.05)	0.0696869	0.216714	0.111996	0.132709	0.133119
	High-organic matter soils
	pH	TC	TN	Total. Streptomyces	Inhibitory. Streptomyces	Proportion. Inhibitory_Ss	Proportion. Inhibitory_Fo	MKZ_Ss	MKZ_Fo
Diversity	0.0530435	-0.335652	0.0330867	-0.294783	-0.164348	0.164348	0.15913	0.0278261	0.534216
	0.927197	0.746336	0.972443	0.746336	0.905218	0.905218	0.911739	0.972443	0.746336
Richness	0.232174	-0.483478	0.127558	-0.210435	-0.0843478	0.175652	0.123478	-0.00173913	0.46652
	0.809844	0.746336	0.927197	0.878465	0.927197	0.905218	0.927197	0.995133	0.746336
Actinobacteria	-0.0217391	0.0834783	0.0592077	0.103478	0.0304348	-0.137391	-0.102609	-0.313913	-0.284032
	0.972443	0.927197	0.927197	0.927197	0.972443	0.922641	0.927197	0.746336	0.809844
Firmicutes	0.206957	0.0591304	0.0940358	-0.163478	-0.0026087	0.0669565	0.350435	0.0643478	-0.207506
	0.887418	0.927197	0.927197	0.905218	0.995133	0.927197	0.746336	0.927197	0.905218
Proteobacteria	-0.178261	0.0721739	-0.0927297	0.0765217	-0.0173913	-0.0173913	-0.0582609	0.246087	0.00294334
	0.905218	0.927197	0.927197	0.927197	0.972443	0.972443	0.927197	0.809844	0.995133
Acidobacteria	0.123478	-0.408696	-0.121463	-0.334783	-0.12087	0.333043	0.224348	0.145217	0.322296
	0.927197	0.746336	0.927197	0.746336	0.927197	0.746336	0.809844	0.922641	0.78862
Bacteroidetes	0.0947826	0.162609	0.230301	0.0878261	-0.111304	-0.151304	-0.0113043	0.053913	0.341428
	0.927197	0.905218	0.809844	0.927197	0.927197	0.911739	0.975721	0.927197	0.764628
Chloroflexi	0.0121739	-0.296522	0.057031	-0.307826	-0.235652	0.193913	0.0295652	-0.297391	0.403238
	0.975721	0.746336	0.927197	0.746336	0.809844	0.905218	0.972443	0.746336	0.746336
Planctomycetes	-0.0721739	-0.204348	-0.137136	-0.202609	-0.14087	0.236522	0.0147826	-0.0921739	0.447388
	0.927197	0.888944	0.922641	0.888944	0.922641	0.809844	0.973545	0.927197	0.746336
Verrucomicrobia	-0.0547826	-0.19913	-0.0217675	-0.143478	-0.130435	0.166957	-0.0530435	-0.0678261	0.395879
	0.927197	0.898099	0.972443	0.922641	0.927197	0.905218	0.927197	0.927197	0.746336
Gemmatimonadetes	-0.193913	-0.12087	-0.185024	-0.397391	-0.233043	0.353043	0.138261	0.155652	0.331126
	0.905218	0.927197	0.905218	0.746336	0.809844	0.746336	0.922641	0.911739	0.772485
TM7	-0.176522	-0.0791304	-0.0274271	-0.151304	-0.108696	-0.0521739	0.06	-0.02	0.317881
	0.905218	0.927197	0.972443	0.911739	0.927197	0.927197	0.927197	0.972443	0.796886
Armatimonadetes	0.152174	-0.250435	0.11798	-0.401739	-0.27913	0.313913	0.261739	0.04	0.298749
	0.911739	0.804378	0.927197	0.746336	0.764628	0.746336	0.776862	0.971962	0.809844
OD1	0.170944	-0.350152	0.0875436	-0.288821	-0.0361027	0.335363	0.231405	0.0987386	0.407953
	0.905218	0.746336	0.927197	0.764628	0.972443	0.746336	0.809844	0.927197	0.746336
Cyanobacteria	-0.14087	-0.0530435	-0.0796692	-0.428696	-0.274783	0.272174	0.331304	-0.168696	0.160412
	0.922641	0.927197	0.927197	0.746336	0.764628	0.764628	0.746336	0.905218	0.927197
Nitrospirae	-0.06	-0.0852174	-0.0774925	-0.453913	-0.356522	0.354783	0.167826	-0.107826	0.467991
	0.927197	0.927197	0.927197	0.746336	0.746336	0.746336	0.905218	0.927197	0.746336
WS3	0.0808696	-0.367826	0.0348281	-0.294783	-0.150435	0.306957	0.178261	-0.0165217	0.223694
	0.927197	0.746336	0.972443	0.746336	0.911739	0.746336	0.905218	0.972443	0.905218
WPS.2	0.366267	-0.279751	0.41421	0.167851	0.305654	0.070974	0.0958408	-0.16267	-0.338214
	0.746336	0.764628	0.746336	0.905218	0.746336	0.927197	0.927197	0.905218	0.764628
Chlamydiae	0.298261	-0.43913	0.0317806	0.10087	0.0243478	-0.0756522	-0.123478	-0.0530435	0.335541
	0.746336	0.746336	0.972443	0.927197	0.972443	0.927197	0.927197	0.927197	0.764628
AD3	-0.0669565	-0.223478	-0.111014	-0.466087	-0.28	0.313043	0.231304	-0.0217391	0.101545
	0.927197	0.809844	0.927197	0.746336	0.764628	0.746336	0.809844	0.972443	0.927197
***VALUES IN RED ARE THE SIGNIFICANT VALUES
